# Supplementary material for: Development of the generic, multidimensional Treatment Expectation Questionnaire (TEX-Q) through systematic literature review, expert surveys and qualitative interviews
Source: PubMed Central journal article supplement — BMJ Open. 2020 Aug 20;10(8):e036169. doi: 10.1136/bmjopen-2019-036169 (PMC7440833; doi:10.1136/bmjopen-2019-036169), 2020-08-20
Supplement: bmjopen-2019-036169supp001.pdf [file bmjopen-2019-036169supp001.pdf]

**Appendix A – Alberts et al. TEX-Q****Appendix A: Description of the literature review**

**Databases:** Pubmed, Psycinfo (through OVID)

**Filter:** Adult (19+) AND human AND English AND 1900-current

**Search terms:** (((treat\* OR therap\*) AND (measure\* OR assess\* OR diagnost\* OR questionnaire OR scale OR instrument) AND (expectation\* OR expectanc\*)).ti,ab.) NOT ((life expectancy).ti,ab.)

**Appendix B – Alberts et al. TEX-Q**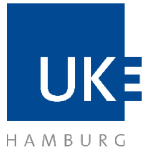

Department of Psychosomatic Medicine and Psychotherapy  
University Medical Center Hamburg-Eppendorf

## INTERVIEW GUIDE

### COGNITIVE INTERVIEWS

#### Study

#### Development and psychometric evaluation of a generic, multidimensional Treatment Expectation Questionnaire (TEX-Q)

Study ID:

|  |  |  |  |  |  |  |  |  |  |
|--|--|--|--|--|--|--|--|--|--|
|  |  |  |  |  |  |  |  |  |  |
|--|--|--|--|--|--|--|--|--|--|

*Comment: the interviewer will read out the following study information to the participant.*

#### Introduction

Thank you for coming in and taking the time to take part in our interview today.

Before we start with the main part of our interview, I would like to explain the background of our study and introduce you to today's procedure. Please read the study information and consent form carefully. If you agree and want to take part in our interview I would like you to sign the consent form. Please ask any questions at any time.

I will record our interview with this audio recorder [*show recorder*] so I do not need to write down everything you say and we can talk openly and freely.

From time to time I will take some additional notes.

#### Explanation of the project

This questionnaire deals with the subject of patient expectations. We aim to apply this questionnaire in order to assess the expectations that a person has regarding a planned treatment. To ensure that the questionnaire is useful and comprehensible, we would like to ask you for your evaluation today.

In this interview, we would especially like to know your impressions of the questionnaire.

In the following, I will ask you to complete the present questionnaire.

#### Explanation of the procedure

I would like you to read each presented statement or question very carefully, read it out loud and mark the answer that applies to you.

While you do this, I would like to know what you think and feel. Please express all occurring thoughts out loud so I can hear them. Please express your thoughts WHILE marking the item.

If you find a statement understandable, please tell me about it. If you find a statement incomprehensible, please tell me about it as well.

## Appendix B – Alberts et al. TEX-Q

In case you do not understand the statement or the question or you do not know how to answer the question, please let me know why this is the case. I would like you to tell me if you like the question or dislike the item and why you do so. If a phrasing appears particularly appropriate or inappropriate to you, I would like you to share your thoughts about the item.

This interview will be conducted openly, none of your answers will have any negative consequences for you. For us, it is relevant to make sure that our questionnaire is comprehensible; there are no right or wrong answers. It is totally fine if you do not want to answer a particular statement, there will be no disadvantages for you. Please do not hold back any thoughts; every thought could be interesting and helpful for us.

In some parts of this questionnaire, we will present two different phrasings for the same question. Please read both of the phrasings carefully and tell me your thoughts about them. If you prefer one phrasing over the other, please tell me about it. We would like to know which of these phrasings you prefer.

You can help us at this phase of our questionnaire development by sharing your thoughts and impressions on the present statements.

[Hand out questionnaire to participant]

### Section 1: Sociodemographic information

[Information is not displayed here.]

### Section 2: information on the disease and treatment

1. For which disease or complaints are you currently seeking treatment?
2. What treatment will you receive?
3. What do you hope for from this treatment?
4. What are your concerns about this treatment?
5. What do you realistically expect from this treatment?  
 negative expectations  -5  -4  -3  -2  -1  0  +1  +2  +3  +4  +5 positive expectations
6. Overall, which expectations regarding the treatment are predominant?
7. Overall, how much improvement do you expect from this treatment?  
 no improvement  0  1  2  3  4  5  6  7  8  9  10 maximum improvement
8. Have you received this treatment before?  
 0  yes 1  no
9. If yes, what experiences have you had with this treatment?
10. If yes, how would you rate your previous experiences with this treatment?

**Appendix B – Alberts et al. TEX-Q**

negative experiences  -5  -4  -3  -2  -1  0  +1  +2  +3  +4  +5 positive experiences

11. Have you previously had other treatments for the same disease or complaints?

0  yes 1  no

12. If yes, what experiences have you had with the previous treatments for your disease or complaints?

13. If yes, how would you rate your overall experiences with the treatments so far?

negative experiences  -5  -4  -3  -2  -1  0  +1  +2  +3  +4  +5 positive experiences

**Section 3: TEX-Q items****Prior to presenting the TEX-Q items:**

The following questions and statements are about the changes that you expect from the treatment.

In this part, we will present 53 different items, 16 of them are using two different phrasings for the same question. Please read both of the phrasings carefully and tell me your thoughts about them. If you prefer one phrasing over the other, please tell me about it. We would like to know which of these phrasings you prefer.

*Comment: 53 Items are presented to the participant, 16 items are presented in two different versions. The items are not displayed here.*

**After presenting the TEX-Q items:**

Thank you for your help! We have reached the end of the questionnaire.

1. Is there anything you would like to tell me right now? What do you think, how do you feel right now? How did you feel about answering the questionnaire?
2. Can you give me a final conclusion on the comprehensibility of the questionnaire?
3. Is there anything you think this is missing from this questionnaire?

**Further questions if the topics have not been discussed yet:**

1. Do you think that the terms “hope” and “expect” have different meanings?
2. Please tell me your thoughts about the following statement:  
“I expect the treatment to improve my functionality”.  
How do you define functionality? [*We aimed to know if the term functionality (German: Funktionsfähigkeit) is comprehensible*]

**References**

Our guideline was influenced by the following references:

1. Charters, E. (2003). The Use of Think-aloud Methods in Qualitative Research. An Introduction to Think-aloud Methods. *Brock Education Vol. 12, No. 2*.
2. Häder, M. Empirische Sozialforschung. Eine Einführung. (2010). 2. edition. VS Verlag für Sozialwissenschaften. 393-394.

**Appendix B – Alberts et al. TEX-Q**

3. Sherman, K. J., Eaves, E. R., Ritenbaugh, C., Hsu, C., Cherkin, D. C., & Turner, J. A. (2014). Cognitive interviews guide design of a new CAM patient expectations questionnaire. *BMC Complementary and Alternative Medicine*, 14(1), 39.
4. van Oort, L., Schröder, C., French, D. P. (2011). What do people think about when they answer the Brief Illness Perception Questionnaire? A 'think-aloud' study. *British Journal of Health Psychology*, 231-245.

## Appendix C – Alberts et al. TEX-Q

## Appendix C: PRISMA flowchart of the literature search

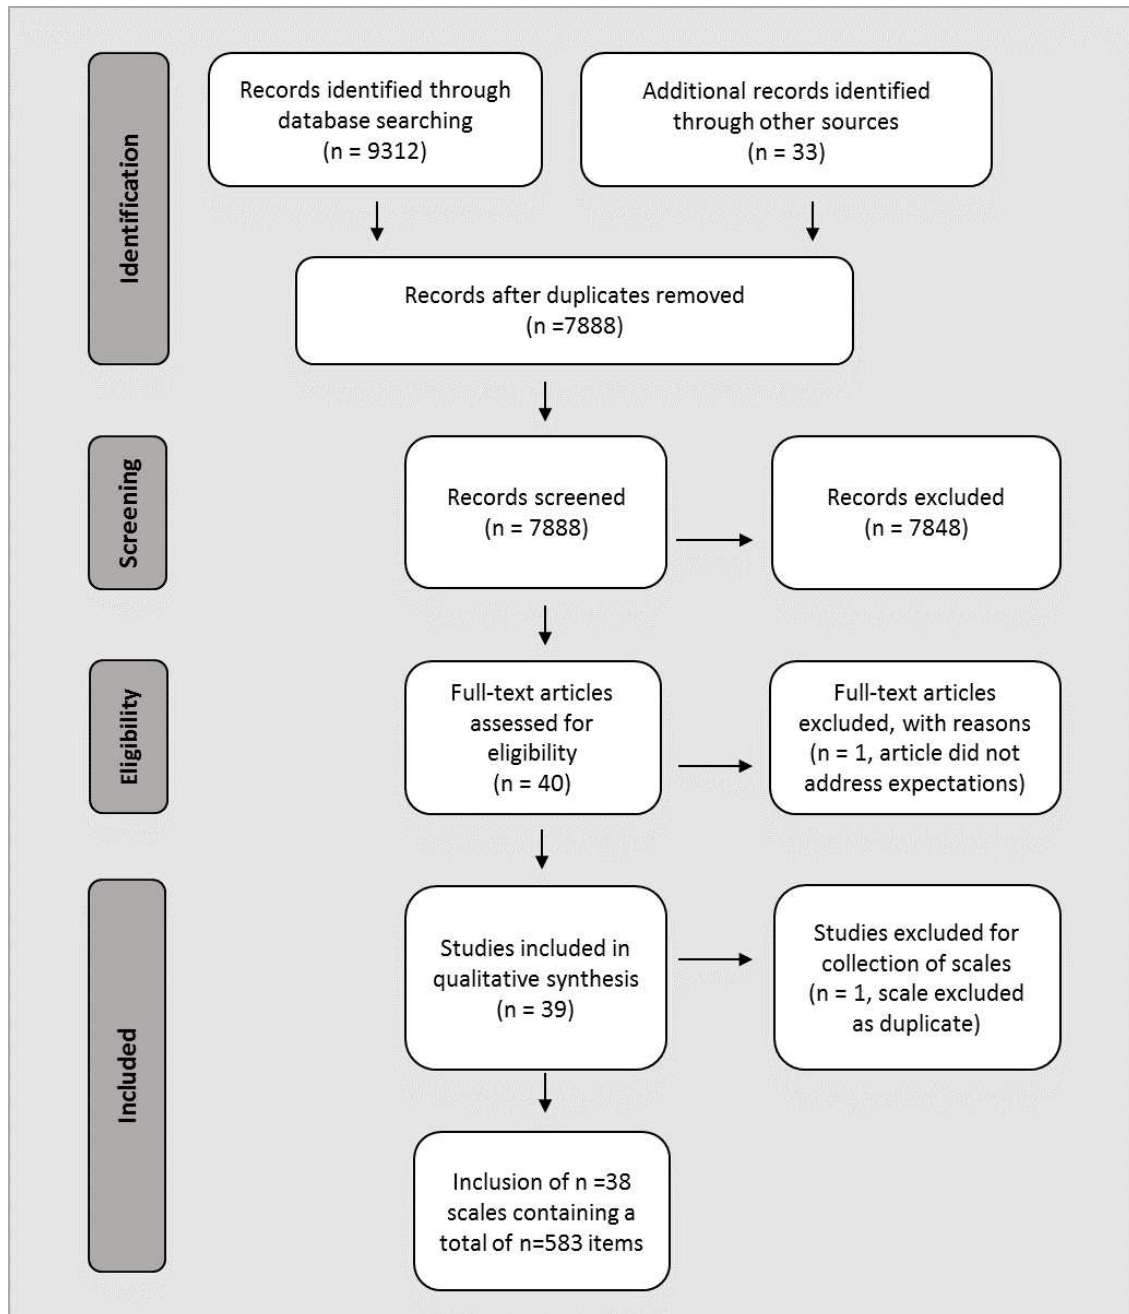

Figure 1: PRISMA flowchart of the literature search
